# Supplementary material for: Co-endemicity of Pulmonary Tuberculosis and Intestinal Helminth Infection in the People’s Republic of China
Source: PLoS Negl Trop Dis. 2016 Apr 18;10(4):e0004580. doi: 10.1371/journal.pntd.0004580 (PMC4835095; doi:10.1371/journal.pntd.0004580)
Supplement: S2 Text — (DOC) [file pntd.0004580.s002.doc]

**Co-endemicity of Pulmonary Tuberculosis and Intestinal Helminth Infection in the People’s Republic of China**

**Supplementary B:**

Making the infectious disease assumption, the likelihood for each disease is assumed to be conditionally independent binomial distribution, *Y1i* *~ Bin* (*p1i*, *N1i*) and *Y2i* *~ Bin* (*p2i*, *N2i*), log (*p1i*) = log (*P1*) + *α1* + *λi* * *δ* + *ψ1i* and log (*p2i*) = log (*P2*) + *α2* + *λi* / *δ* + *ψ2i*, where *Y1i* and *Y2i* are the patients of active pulmonary tuberculosis and intestinal helminth infection respectively, *N1i* and *N2i* are the populationand *p1i* and *p2i* are the underlying population prevalence in county *i* (*i* = 1, …, n) respectively, *P1* and *P2* are overall prevalence at the national-scale of both diseases respectively which assumes the same prevalence in each county, *α1* and *α2* are intercepts representing the baseline (log) relative risks of both diseases across the country respectively, *δ* is a scaling factor to allow the risk gradient associated with the shared component to be different for each disease, *λi* represents the common (shared) component and *ψ1i* and *ψ2i* represent two disease-specific (residual) components respectively in county *i*. Each of the three components (*λ*, *ψ1* and *ψ2*) is assumed to be spatially structured with zero mean, and the components are assumed to be independent of each other.

Besag, York and Mollié (BYM) convolution prior distributions was assigned to each component. We assumed the spatial priors for the shared random effects, as *λi* = *μλi* + *ζλi*, where *μλi* is unstructured shared random effects and follows a zero-mean normal distribution *μλi* *~ N* (0, *ωμ*) and *ζλi* is spatial shared random effects and follows a conditional autoregressive (CAR) normal distribution *ζλi* *~* *CARNormal* (W, *ωζ*) with W the matrix representing the neighborhood structure (here two counties are assumed as neighbors if they share a common boundary). We also assumed the spatial priors for the disease-specific random effects, as *ψi* (*ψ1i* or *ψ2i*) *=* *μψi* + *ζψi*, where *μψi* is unstructured disease-specific random effects and follows a zero-mean normal distribution *μψi* *~ N* (0, *τμ*) and *ζψi* is spatial disease-specific random effects and follows a CAR normal distribution *ζλi* *~* *CARNormal* (W, *τζ*). Finally, the hyperprior specifications for the parameters were *α* *~* *dflats* ( ), log (*δ*) *~* *N* (0, 5.9), and *ωμ ~* *gamma* (0.5, 0.0005), *ωζ* *~* *gamma* (0.5, 0.0005), *τμ ~* *gamma* (0.5, 0.0005) and *τζ* *~* *gamma* (0.5, 0.0005).

**References**

1. Held L, Graziano G, Frank C, Rue H. Joint spatial analysis of gastrointestinal infectious diseases. Statistical methods in medical research. 2006;15(5):465-80. doi: 10.1177/0962280206071642

2. Lunn DJ, Thomas A, Best N, Spiegelhalter D. WinBUGS - a Bayesian modelling framework: concepts, structure, and extensibility. Statistics and Computing. 2000;10(4):325-37.

3. Besag J, York J, Mollié A. Bayesian image restoration, with two applications in spatial statistics. Annals of the Institute of Statistical Mathematics. 1991;43(1):1-20.
